# Supplementary material
Source: PubMed Central journal article supplement (PMC3964368)
Supplement: NIHMS511476-supplement-S1.pdf [file NIHMS511476-supplement-S1.pdf]

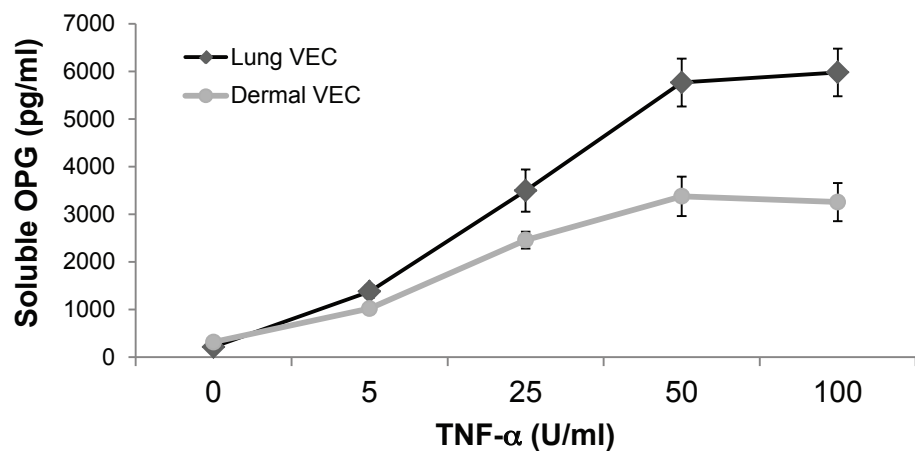

Supplemental Figure 1. TNF- $\alpha$ -induced OPG production by human vascular endothelial cell lines. Soluble OPG production by human VECs after 72 h culture, assessed by specific ELISA. Data are mean  $\pm$  standard deviation of three replicates in a single experiment; one of three representative experiments shown.
