# Supplementary material
Source: PubMed Central journal article supplement (PMC3964368)
Supplement: NIHMS511476-supplement-S2.pdf [file NIHMS511476-supplement-S2.pdf]

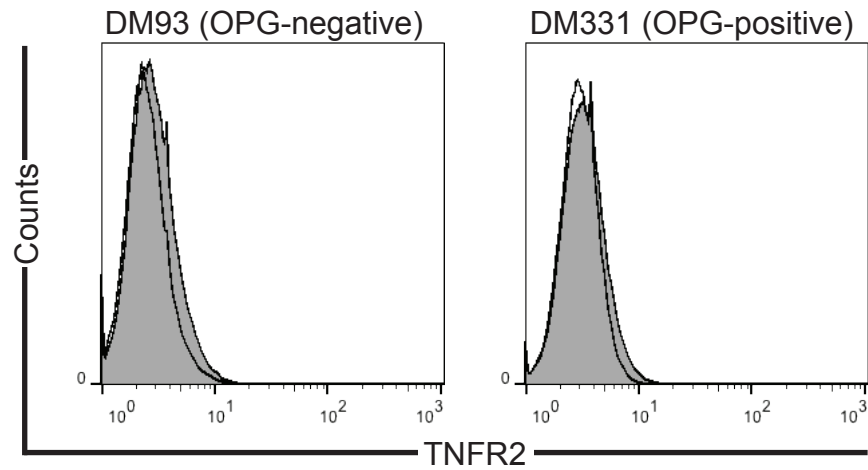

Supplemental Figure 2. TNFR2 staining on OPG-negative (DM93) and OPG-positive (DM331) melanoma. No significant TNFR2 staining was detected on melanomas, regardless of OPG production. Representative data from one of three similar experiments.
