# Supplementary material
Source: PubMed Central journal article supplement (PMC3964368)
Supplement: NIHMS511476-supplement-S3.pdf [file NIHMS511476-supplement-S3.pdf]

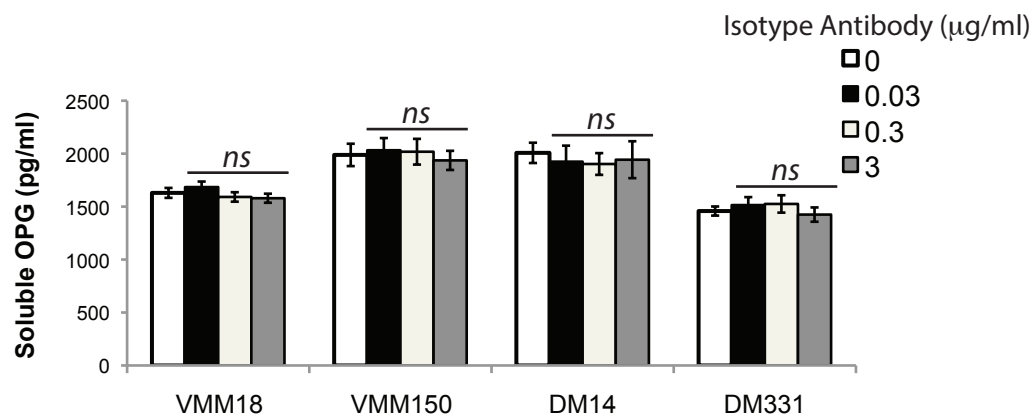

Supplemental Figure 3. OPG production in the absence or presence of antibody clone 11711 (isotype match to anti-TNFR1 and antiTNF- $\alpha$  mAb used in the studies shown in Figure 5). No significant change in OPG production was observed, regardless of mAb concentration. *ns*, not significant ( $p > 0.05$ ) compared to untreated cell culture. Representative data from one of three similar experiments.
